## RESEARCH ARTICLE

Efficacy of *Ginkgo biloba* on parameters in glaucoma: A systematic review

Julia Prinz<sup>1,2</sup>, Verena Prokosch<sup>2\*</sup>, Xiaosha Wang<sup>2</sup>, Yuan Feng<sup>2</sup>, Peter Walter<sup>1</sup>, Matthias Fuest<sup>1</sup>, Filippo Migliorini<sup>3,4</sup>

**1** Department of Ophthalmology, University Hospital RWTH Aachen, Aachen, Germany, **2** Department of Ophthalmology, University Hospital of Cologne, Cologne, Germany, **3** Department of Orthopedics and Trauma Surgery, Academic Hospital of Bolzano (SABES-ASDAA), Bolzano, Italy, **4** Department of Life Sciences, Health, and Health Professions, Link Campus University, Rome, Italy

☞ These authors contributed equally to this work.

\* [verena.prokosch@uk-koeln.de](mailto:verena.prokosch@uk-koeln.de)

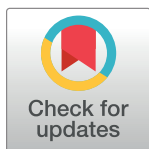

## Abstract

## Purpose

This study aims to analyse the efficacy of GBE administration in patients with glaucoma and healthy volunteers.

## Methods

This systematic review was performed according to the PRISMA 2020 guidelines. All clinical studies investigating the efficacy of GBE administration on the intraocular pressure (IOP), the corrected pattern standard deviation (CPSD) and the mean deviation of visual field testing, and heart rate were considered. The weighted mean difference (MD) effect measure, 95% confidence interval (CI), and t-test were used for continuous variables.

## Results

Data from 8 studies, including 428 patients, were retrieved. The mean age of all patients was  $51.1 \pm 15.5$  years. The median follow-up was 3.7 (IQR 9.4) months. The administration of GBE was not associated with an improvement in IOP (MD -1.5; 95%CI -7.1 to 9.6;  $P = 0.5$ ), mean deviation (MD 0.7; 95%CI -9.4 to 8.2;  $P = 0.8$ ), CPSD (MD -1.6; 95%CI -3.8 to 6.9;  $P = 0.5$ ), or heart rate (MD -2.5; 95%CI -11.5 to 16.5;  $P = 0.4$ ) from baseline to the last follow-up. There was no difference between GBE versus the control group in IOP (MD 1.1; 95%CI -5.7 to 3.5;  $P = 0.4$ ), mean deviation (MD -0.4; 95%CI -9.1 to 9.9;  $P = 0.9$ ), CPSD (MD 0.3; 95%CI -6.8 to 6.2;  $P = 0.9$ ), and heart rate (MD -1.3; 95%CI -15.1 to 17.7;  $P = 0.8$ ) at the last follow-up.

## Conclusion

Currently, the evidence is not sufficient to conclude that GBE affects IOP, mean deviation, CPSD, or heart rate in glaucoma patients and healthy volunteers. These conclusions must be interpreted with caution given the limitations of the reviewed studies, particularly the follow-up time of the included studies.

## OPEN ACCESS

**Citation:** Prinz J, Prokosch V, Wang X, Feng Y, Walter P, Fuest M, et al. (2025) Efficacy of *Ginkgo biloba* on parameters in glaucoma: A systematic review. PLoS ONE 20(2): e0314644. <https://doi.org/10.1371/journal.pone.0314644>

**Editor:** Jae Hee Kang, Brigham and Women's Hospital, UNITED STATES OF AMERICA

**Received:** March 30, 2024

**Accepted:** November 11, 2024

**Published:** February 14, 2025

**Copyright:** © 2025 Prinz et al. This is an open access article distributed under the terms of the [Creative Commons Attribution License](https://creativecommons.org/licenses/by/4.0/), which permits unrestricted use, distribution, and reproduction in any medium, provided the original author and source are credited.

**Data Availability Statement:** All relevant data are within the manuscript and its [Supporting information](#) files.

**Funding:** The author(s) received no specific funding for this work.

**Competing interests:** The authors have declared that no competing interests exist.

## Introduction

Glaucoma is a heterogeneous group of diseases characterised by apoptosis of retinal ganglion cells (RGCs) and their axons [1]. RGCs are the innermost neurons of the retina and transmit visual signals from the retina along axons that extend in the optic nerve to the brain [2]. Recently, it has been suggested that RGCs may enter a state of physiological dysfunction prior to apoptosis [2].

Elevated intraocular pressure (IOP) causes mechanical RGC and axonal damage and interrupts nutrient transmission [1]. Lowering IOP is the current mainstay of treatment but does not halt glaucoma progression in many patients [3]. Therefore, alternative treatment strategies independently of IOP to prevent or delay glaucomatous neurodegeneration are urgently warranted [4, 5]. Besides elevated IOP, advancing age [6], glutamate excitotoxicity [7], oxidative stress [8], endothelial [9] and mitochondrial [10] dysfunction, neurotrophin deficiency [11], and further risk factors have been identified to contribute to glaucoma progression. Recently, the role of vascular abnormalities in the pathogenesis of glaucoma has been highlighted, including reduced perfusion pressure, local vasospasms, and impaired retinal blood flow auto-regulation [12–15].

In patients with dementia such as Alzheimer's disease, standardised *Ginkgo biloba* extract (GBE) derived from dried leaves of the *Ginkgo* tree has been postulated to slow the progression of memory impairment [16]. GBE has been shown to play an important role in the treatment of several degenerative eye diseases, such as age-related macular degeneration, diabetic retinopathy, ischaemic retinal disease, and glaucoma [17, 18]. However, to date, the efficacy of GBE in these diseases is inconclusive [17, 19].

The rationale behind using GBE in these diseases is that GBE contains different flavonoids, terpene lactones, and organic acids [20]. Flavonoids are naturally occurring polyphenolic compounds that deliver electrons to free radicals and reduce the production of eicosanoids by inhibiting the activity of phospholipase A2 [21–23]. In addition to its antioxidative and anti-inflammatory properties, GBE has been shown to improve endothelium-dependent vasodilation, thereby increasing microcirculation and reversing vasospasms [23–25]. Also, GBE stabilises the inner mitochondrial membrane and increases the membrane potential, which restores the respiratory chain and increases the production of adenosine triphosphate [26, 27].

In previous studies, GBE has been shown to slow the progression of visual field damage and improve visual function in normal tension glaucoma (NTG) patients [28, 29]. However, to date, conclusive evidence of the efficacy of GBE on IOP, the mean deviation and the corrected pattern standard deviation (CPSD) of visual field testing, and the heart rate are lacking. This systematic review investigates first-time the impact of GBE on IOP, mean deviation, CPSD, and the heart rate in glaucoma patients and healthy volunteers.

## Material and methods

### Eligibility criteria

All the comparative studies evaluating the efficacy of oral GBE administration in patients with glaucoma and healthy volunteers were retrieved. Studies which compared GBE administration in isolation or combined with the standard therapy for glaucoma were considered. Studies combining GBE with other neuroprotective substances in the GBE group were excluded. Only studies that compared GBE administration with a control group of patients undergoing standard therapy, placebo or no therapy were considered. Given the authors' language capabilities, English, Italian, German, Spanish, and French articles were eligible. Levels I to IV of evidence, according to the Oxford Centre of Evidence-Based Medicine [30], were considered. Reviews,

opinions, letters, editorials, animal, in vitro, or biomechanics studies were not considered. A lack of quantitative data on the outcomes of interest led to an exclusion from the present study.

### Search strategy

This systematic review was conducted according to the 2020 PRISMA (Preferred Reporting Items for Systematic Reviews and Meta-Analyses) statement [31]. The PICO algorithm was preliminary established:

- P (Population): patients with glaucoma or healthy volunteers;
- I (Intervention): GBE supplementation (in addition to conventional therapy);
- C (Comparison): control group (standard therapy, placebo or no therapy);
- O (Outcomes): IOP, mean deviation, CPSD, heart rate.

In December 2023, the following databases were accessed: Google Scholar, Web of Science, PubMed, and Embase. No time constraints were used for the search. The following keywords were used in combination: *Ginkgo*; *Ginkgo biloba*; *Ginkgo biloba extract*; *glaucoma*, *open-angle glaucoma*, *OAG*, *primary open-angle glaucoma*, *POAG*, *secondary glaucoma*, *juvenile glaucoma*, *pseudoexfoliative glaucoma*, *normal tension glaucoma*, *NTG*, *angle closure glaucoma*, *pigmentary glaucoma*, *phacogenic glaucoma*, *neovascular glaucoma*, *intraocular pressure*; *visual field testing*; *mean deviation of visual field testing*; *corrected pattern standard deviation*; *ocular blood flow*; *optic nerve*; *neuroretinal rim*; *heart rate*.

### Selection and data collection

Two authors (JP; FM) independently performed the database search. All the resulting titles were screened, and the abstracts and full texts were accessed if suitable. Disagreements were discussed, and a third author made the final decision.

### Data items

Data extraction was conducted independently by two authors (JP, FM). The following data were extracted: study generalities (author, journal, year, design, level of evidence, and follow-up length) and patient demographics (number of patients, mean age, and women). If the studies reported data from several follow-up appointments, only data from the last follow-up were included for analysis. Data concerning the following parameters were retrieved: IOP, mean deviation, CPSD, and heart rate. The outcomes of interest were (1) to evaluate the effect of GBE on the IOP, mean deviation, CPSD, and heart rate and (2) to evaluate possible adverse events.

### Study risk of bias analysis

The risk of bias was assessed in accordance with the guidelines in the Cochrane Handbook for Systematic Reviews of Interventions [32]. Two authors (JP; FM) independently evaluated the risk of bias in the extracted studies. Randomised controlled trials (RCTs) were assessed using the risk of bias of the software Review Manager 5.3 (The Nordic Cochrane Collaboration, Copenhagen). The following endpoints were evaluated: detection, reporting, attrition, selection, performance, and other biases. The Risk of Bias in Nonrandomised Studies of Interventions (ROBINS-I) tool was used to assess the risk of bias in non-RCTs [33].

## Statistical analysis

Statistical analysis was conducted using the IBM SPSS software version 25. For descriptive statistics, the weighted mean, with the weights being the sample size, and standard deviation was used. The weighted mean and standard deviation were used to assess baseline comparability. Given the heterogeneity, data variability on follow-up was evaluated using the interquartile range (IQR). Between-group comparisons at the last follow-up were evaluated using the mean difference effect measure (MD) and unpaired t-test. Changes from baseline to the last follow-up were evaluated using the MD and unpaired t-test. The overall effect was considered statistically significant if  $P < 0.05$ .

## Results

### Literature search

The literature search led to 4158 articles, of which 1102 were excluded due to duplication. A further 2933 studies were excluded based on the abstracts of the records. Thus, 123 full-text articles were screened, of which 108 studies were excluded because of the following reasons: type of study ( $N = 47$ ), combination of different supplements ( $N = 8$ ), language incompatibility ( $N = 4$ ), or other reasons ( $N = 49$ ). Seven studies did not report quantitative data under the endpoints of interest and were therefore not included in this study. Finally, eight studies were included. The literature search results are displayed in [Fig 1](#) and [S2 Table](#).

### Study risk of bias analysis

The Cochrane risk of bias tool was conducted to evaluate the risk of bias of RCTs. Given the number of retrospective studies included in the present systematic review, the risk of selection bias was moderate. Few studies performed blinding, leading to a moderate risk of detection bias. The risk of attrition, reporting and other biases was moderate. In conclusion, the risk of bias graph evidenced a moderate quality of the methodological assessment of RCTs ([Fig 2](#)).

The ROBINS-I was performed to investigate the risk of bias of non-RCTs. The risks of bias due to confounding and deviation from the intended intervention were moderate. The risks of bias in the selection of participants for the study, bias in the classification of interventions and bias due to missing data were considered low to moderate, as was the risk of bias in the measurement of outcomes. Also, a low to moderate risk of bias was evidenced in the selection of the reported results. Overall, the quality of the methodological assessment was low to moderate ([Table 1](#)).

### Study characteristics

A total of 428 patients were included for analysis. 56% (241 of 428 patients) were women. The median follow-up was 3.7 (IQR 9.4) months. The mean age was  $51.1 \pm 15.5$  years. Patients with NTG ( $n = 327$ ), primary open-angle glaucoma (POAG,  $n = 30$ ), and healthy volunteers ( $n = 71$ ) were included. Demographic data of the patients are shown in [Table 2](#) and [S1 Table](#).

### Baseline comparability

At baseline, no significant differences were found in IOP ( $P = 0.5$ ), mean deviation ( $P = 0.7$ ), CPSD ( $P = 0.8$ ), and heart rate ( $P = 0.8$ , [Table 3](#)) between the GBE and the control group.

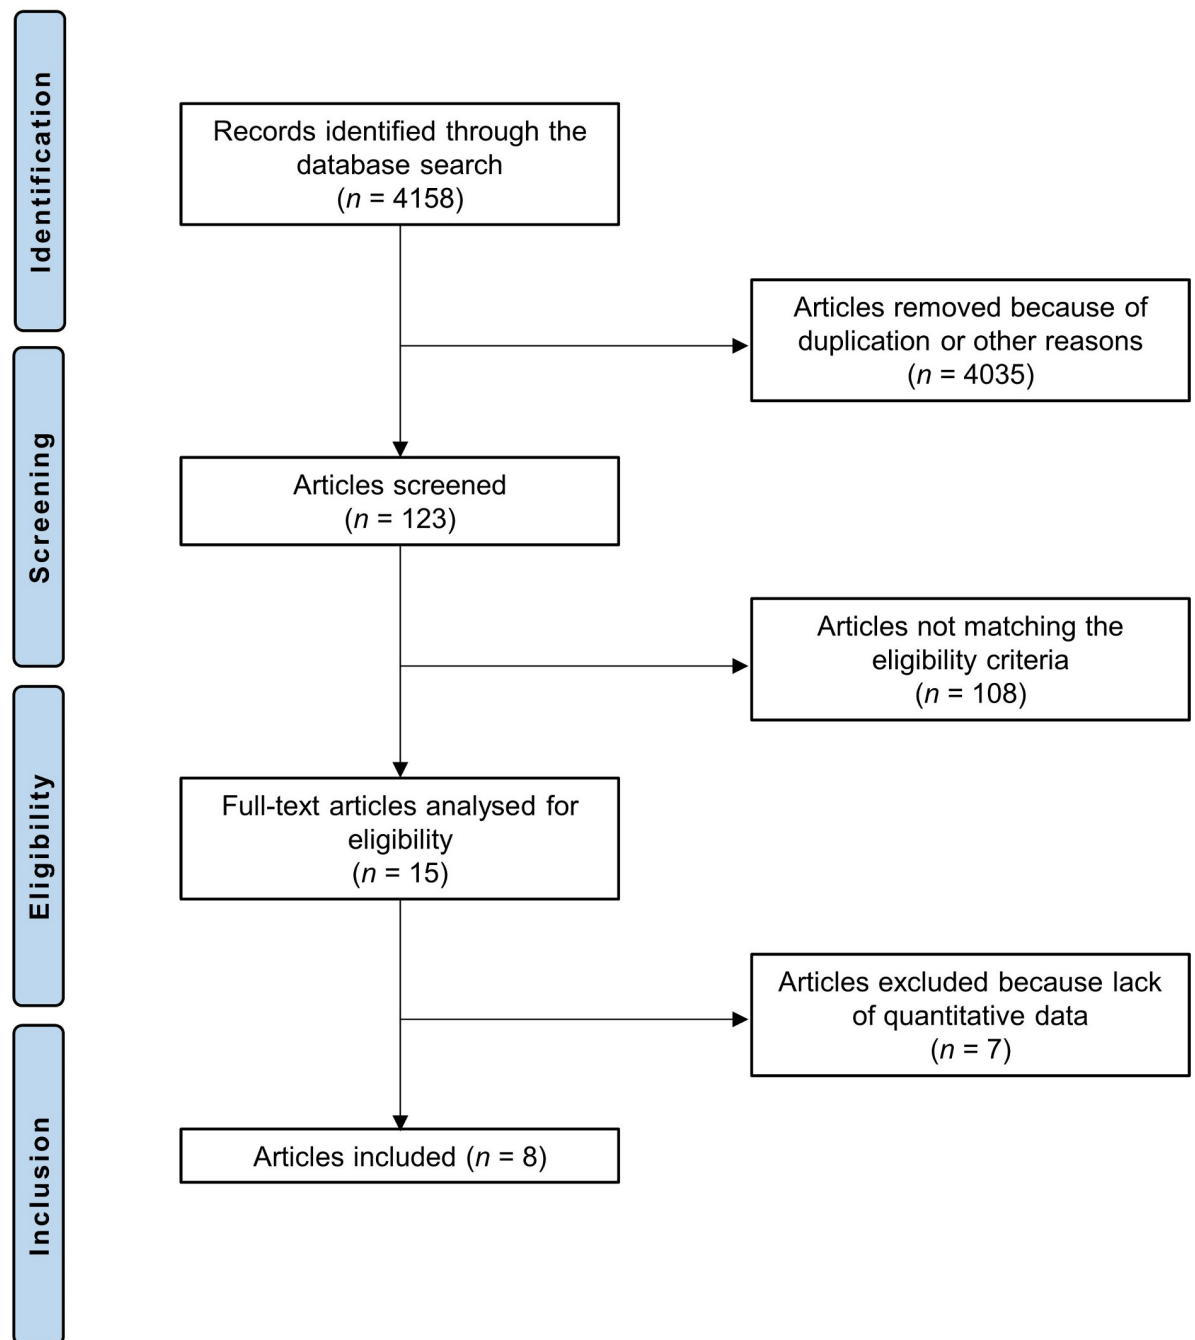

Fig 1. Flow chart of the literature search.

<https://doi.org/10.1371/journal.pone.0314644.g001>

## Result syntheses

The administration of GBE was not associated with an improvement in IOP (MD -1.5; 95%CI -7.1 to 9.6;  $P = 0.5$ ), mean deviation (MD 0.7; 95%CI -9.4 to 8.2;  $P = 0.8$ ), CPSD (MD -1.6; 95%CI -3.8 to 6.9;  $P = 0.5$ ), or heart rate (MD -2.5; 95%CI -11.5 to 16.5;  $P = 0.4$ ) from baseline to the last follow-up (Table 4).

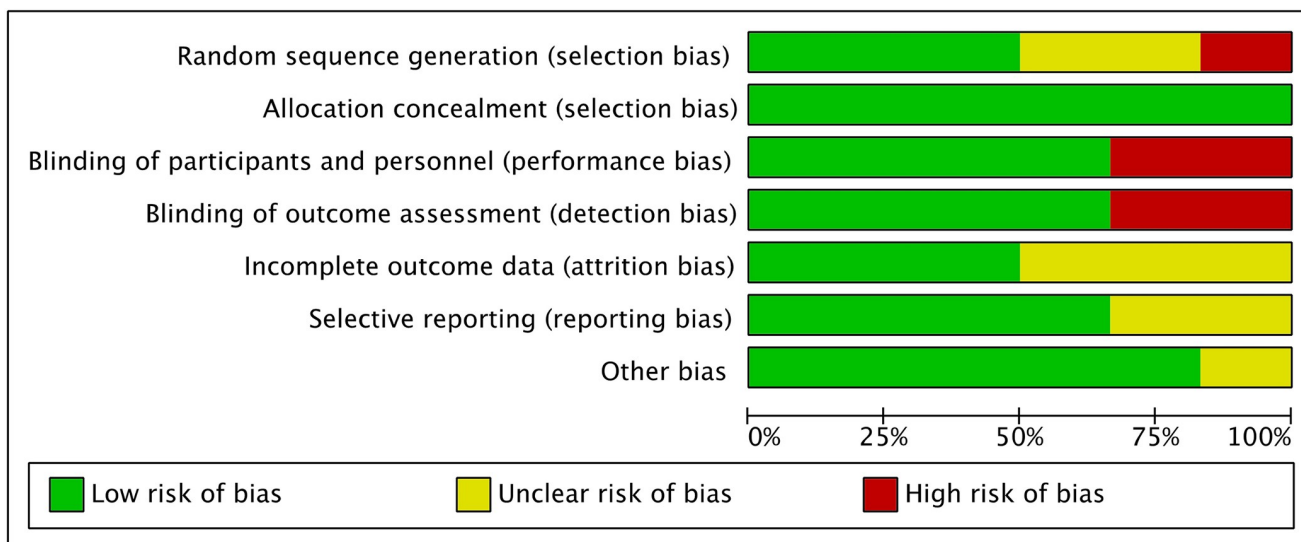

**Fig 2. Methodological quality assessment.**

<https://doi.org/10.1371/journal.pone.0314644.g002>

At the last follow-up, there was no difference between GBE and the control group in IOP (MD 1.1; 95%CI -5.7 to 3.5;  $P = 0.4$ ), mean deviation (MD -0.4; 95%CI -9.1 to 9.9;  $P = 0.9$ ), CPSD (MD 0.3; 95%CI -6.8 to 6.2;  $P = 0.9$ ), and heart rate (MD -1.3; 95%CI -15.1 to 17.7;  $P = 0.8$ ). Table 5 shows these results in greater detail.

## Discussion

GBE administration did not significantly improve IOP, mean deviation, CPSD, or heart rate in patients with glaucoma and healthy volunteers after a mean follow-up of 23.3 (median 3.7) months.

The rationale behind investigating the efficacy of GBE on glaucoma parameters is its potential neuroprotective effect, which has been attributed to anti-oxidative, anti-inflammatory, anti-apoptotic, vaso-active, and angiogenetic properties [17, 40]. On a molecular level, GBE

**Table 1. Risk of Bias in Nonrandomised Studies of Interventions (ROBINS-I) evaluation.**

| Study               | Bias due to confounding | Bias in selection of participants into the study | Bias in classification of interventions | Bias due to deviations from intended intervention | Bias due to missing data | Bias in measurement of outcomes | Bias in selection of the reported results | Overall risk of bias |
|---------------------|-------------------------|--------------------------------------------------|-----------------------------------------|---------------------------------------------------|--------------------------|---------------------------------|-------------------------------------------|----------------------|
| Guo, 2014 [34]      | Low                     | Moderate                                         | Low                                     | Low                                               | Low                      | Low                             | Low                                       | Low                  |
| Lee, 2013 [29]      | Moderate                | Low                                              | Moderate                                | Moderate                                          | Moderate                 | Low                             | Moderate                                  | Moderate             |
| Quaranta, 2003 [35] | Low                     | Low                                              | Moderate                                | Low                                               | Low                      | Low                             | Low                                       | Low                  |
| Sabaner, 2021 [36]  | High                    | Moderate                                         | Moderate                                | Moderate                                          | Low                      | Moderate                        | Low                                       | Moderate             |
| Sari, 2016 [37]     | Low                     | Low                                              | Low                                     | Moderate                                          | Moderate                 | Low                             | Low                                       | Moderate             |
| Shim, 2012 [28]     | High                    | Low                                              | Moderate                                | High                                              | Low                      | Low                             | Moderate                                  | Moderate             |

<https://doi.org/10.1371/journal.pone.0314644.t001>

**Table 2. Characteristics and patient baseline of the included studies (GBE: *Ginkgo biloba* extract, NTG: Normal tension glaucoma, POAG: Primary open-angle glaucoma, IOP: Intraocular pressure, mean deviation: Mean deviation of the visual field testing, CPSD: Corrected pattern standard deviation of visual field testing, NR: Not reported).**

| Author et al., year | Study design   | Follow-up (months) | Group   | Treatment                    | Patients (n) | Patient charact.   | Mean age (years) | Women (%) | Endpoints                             |
|---------------------|----------------|--------------------|---------|------------------------------|--------------|--------------------|------------------|-----------|---------------------------------------|
| Chung, 1999 [38]    | RCT            | 0.5                | GBE     | 40 mg GBE, three times daily | 5            | Healthy volunteers | 34.0             | 73        | IOP, heart rate                       |
|                     |                |                    | Placebo | placebo                      | 6            |                    | 34.0             | 73        |                                       |
| Guo, 2014 [34]      | Retro-spective | 3.7                | GBE     | 40 mg GBE, three times daily | 14           | NTG                | 62.3             | 50        | mean deviation, heart rate            |
|                     |                |                    | Placebo | placebo                      | 14           |                    | 65.1             | 36        |                                       |
| Lee, 2013 [29]      | Retro-spective | 147.6              | GBE     | 80 mg GBE, twice daily       | 42           | NTG                | 47.1             | 55        | IOP                                   |
| Park, 2011 [39]     | RCT            | 0.9                | GBE     | 80 mg GBE, twice daily       | 15           | NTG                | NR               | 53        | IOP, CPSD                             |
|                     |                |                    | Placebo | placebo                      | 15           |                    | NR               | 73        |                                       |
| Quaranta, 2003 [35] | Retro-spective | 2.7                | GBE     | 40 mg GBE, three times daily | 14           | NTG                | 70.4             | 59        | IOP, mean deviation, CPSD, heart rate |
|                     |                |                    | Placebo | placebo                      | 13           |                    | 70.4             | 59        |                                       |
| Sabaner, 2021 [36]  | Pro-spective   | 1.0                | GBE     | 120 mg GBE daily             | 60           | Healthy volunteers | 20.6             | 53        | IOP                                   |
| Sari, 2016 [37]     | Pro-spective   | 6.0                | GBE     | 40 mg GBE, twice daily       | 20           | POAG               | 54.6             | 70        | IOP, mean deviation                   |
|                     |                |                    | Placebo | placebo                      | 10           |                    | 54.9             | 60        |                                       |
| Shim, 2012 [28]     | Retro-spective | 23.8               | GBE     | 80 mg GBE, twice daily       | 103          | NTG                | 47.0             | 37        | mean deviation                        |
|                     |                |                    | Control | No treatment                 | 97           |                    | 52.3             | 37        |                                       |

<https://doi.org/10.1371/journal.pone.0314644.t002>

targets various signalling pathways that play a role in glaucoma, such as the protein-1 signalling pathway, which suppresses tumour necrosis factor  $\alpha$  (TNF  $\alpha$ ) [41]. TNF  $\alpha$  is a critical pro-inflammatory cytokine implicated in the apoptotic death of RGCs in glaucoma [42]. Also, GBE is involved in the activation of the adenosine monophosphate-activated protein kinase (AMPK) signalling pathway, affecting NF $\kappa$ B, mTOR, Nrf-2, and Wnt/ $\beta$ -catenin signalling pathways [40], which are implicated in the pathogenesis of glaucoma [43–45].

Vascular dysregulation and vasospasms have been postulated to contribute to the pathogenesis of glaucoma [46, 47]. To date, only a few studies have investigated the effect of GBE on ocular or peripapillary blood flow [36]. GBE has been shown to increase nitric oxide (NO) levels, which leads to vasodilation and increased blood flow via vasodilatory molecules, including histamine, bradykinin, substance P, and acetylcholine [17]. Also, GBE inhibits prostaglandin PGI<sub>2</sub>, leading to a decreased renin release and less vasoconstriction via the renin-angiotensin

**Table 3. Baseline comparability between the *Ginkgo biloba* extract (GBE) and control groups.** Data is presented as arithmetic mean and standard deviation. (IOP: intraocular pressure, mean deviation: mean deviation of the visual field testing, CPSD: corrected pattern standard deviation of visual field testing, bpm: beats per minute).

| Endpoint            | GBE            | Control        | P   |
|---------------------|----------------|----------------|-----|
| IOP [mmHg]          | 15.3 $\pm$ 4.2 | 16.9 $\pm$ 5.1 | 0.5 |
| Mean deviation [dB] | -7.3 $\pm$ 3.2 | -7.8 $\pm$ 4.1 | 0.7 |
| CPSD                | 9.1 $\pm$ 2.6  | 8.4 $\pm$ 2.7  | 0.8 |
| Heart rate [bpm]    | 70.3 $\pm$ 4.9 | 69.6 $\pm$ 5.2 | 0.8 |

<https://doi.org/10.1371/journal.pone.0314644.t003>



**Table 4. Evaluation of *Ginkgo biloba extract* (GBE) administration at baseline and the last follow-up (FU) in the GBE group.** Data is presented as arithmetic mean and standard deviation (IOP: intraocular pressure, mean deviation: mean deviation of the visual field testing, CPSD: corrected pattern standard deviation of visual field testing, bpm: beats per minute, CI: confidence interval).

| Endpoint            | At baseline | Last FU    | Mean difference | 95%CI         | P   |
|---------------------|-------------|------------|-----------------|---------------|-----|
| IOP [mmHg]          | 15.3 ± 4.2  | 13.8 ± 1.2 | -1.5            | -7.1 to 9.6   | 0.5 |
| Mean deviation [dB] | -7.3 ± 3.2  | -6.6 ± 3.1 | 0.7             | -9.4 to 8.2   | 0.8 |
| CPSD                | 9.1 ± 2.6   | 7.5 ± 0.9  | -1.6            | -3.8 to 6.9   | 0.5 |
| Heart rate [bpm]    | 70.3 ± 4.9  | 67.8 ± 5.2 | -2.5            | -11.5 to 16.5 | 0.4 |

<https://doi.org/10.1371/journal.pone.0314644.t004>

pathway [48]. In a study by Sabaner et al., a 4-week consumption of GBE led to an increase in peripapillary, superior, inferior, and temporal quadrant radial peripapillary capillary vascular density in healthy volunteers [36]. A prospective study found a significant increase in blood flow measured by a confocal scanning laser Doppler flowmeter in the GBE group compared to a placebo group, including 30 NTG patients [39]. Chung et al. found a significantly increased end-diastolic velocity in the ophthalmic artery measured by colour Doppler imaging in healthy volunteers following GBE treatment of 120 mg daily for two days. In contrast, no changes were witnessed in the placebo group [38]. In a study by Lee et al., the same dose of GBE administered for four weeks led to an increased microcirculatory blood velocity and flow [29].

Impaired vascular function significantly contributes to the progressive degeneration of RGCs and the optic nerve in glaucoma [15]. Emerging evidence suggests that GBE supplementation might be associated with increased ocular blood flow and reduced vasospasms, hypothetically slowing glaucoma progression. However, GBE was not associated with a significant improvement in mean deviation or CPSD in the present study, which might be attributable to the heterogeneous duration of GBE supplementation and follow-ups in the included studies as well as heterogeneous patient characteristics, including healthy volunteers, POAG, and NTG patients.

GBE administration resulted in a significant reduction of the heart rate in animal studies [49]. As fluctuations of IOP depending on the heart rate have been witnessed previously, the effects of neuroprotective agents on the heart rate might affect glaucoma progression [50]. A faster heart rate is associated with a lower neural tissue shear, which might limit axonal damage in the neuroretinal rim region [51, 52]. However, no significant effect of GBE on the heart rate was detected in the included studies [34, 35, 38].

None of the included studies evidenced significant changes using GBE on IOP in glaucoma patients or healthy volunteers [28, 29, 35–39].

Shim et al. [28] reported a significant improvement in visual acuity in NTG patients receiving 160 mg GBE daily for almost two years. Investigating healthy volunteers, Sabaner et al. found no changes in visual acuity following GBE treatment [36]. No further visual acuity outcomes were reported in the included studies. Given the lack of quantitative data for analysis, visual acuity could not be considered an endpoint of the present study.

**Table 5. Comparison of the *Ginkgo biloba extract* (GBE) and the control group.** Data is presented as arithmetic mean and standard deviation. (IOP: intraocular pressure, mean deviation: mean deviation of the visual field testing, CPSD: corrected pattern standard deviation of visual field testing, bpm: beats per minute, CI: confidence interval).

| Endpoint            | GBE        | Control    | Mean difference | 95%CI         | P   |
|---------------------|------------|------------|-----------------|---------------|-----|
| IOP [mmHg]          | 13.8 ± 1.2 | 14.9 ± 2.0 | 1.1             | -5.7 to 3.5   | 0.4 |
| Mean deviation [dB] | -6.6 ± 3.1 | -7.0 ± 3.7 | -0.4            | -9.1 to 9.9   | 0.9 |
| CPSD                | 7.5 ± 0.9  | 7.8 ± 3.2  | 0.3             | -6.8 to 6.2   | 0.9 |
| Heart rate [bpm]    | 68.3 ± 6.1 | 67.0 ± 5.7 | -1.3            | -15.1 to 17.7 | 0.8 |

<https://doi.org/10.1371/journal.pone.0314644.t005>



Quaranta et al. investigated the effect of GBE on pre-existing visual field damage in patients with NTG. They found a significant improvement in mean deviation and CPSD after GBE treatment [35]. In a study by Lee et al. [29], GBE slowed the progression of visual field damage in NTG patients with a mean follow-up of 12.3 years. In previous studies by Park et al. and Guo et al., no significant impact of GBE therapy on the mean deviation was witnessed [34, 39]. Current evidence suggests that GBE supplementation may contribute to maintaining the visual field and that long-term treatment could even restore visual field defects in patients with glaucoma [29, 34, 39]. With a mean follow-up of 23.3 (median 3.7) months, visual field parameters were not worsening in patients receiving GBE in the included studies. However, there were no significant differences between the GBE and control group at the final follow-up, suggesting no superiority of GBE over placebo or no treatment in maintaining visual field defects. Guo et al. hypothesise that the treatment period in their study (4 weeks) was too short to demonstrate a clinical improvement in the visual field [34]. Additionally, the authors argue that the small sample size in their study may not have been sufficient to reveal the clinical effect of GBE on mean deviation [34]. Heterogeneity in patient characteristics, including ethnicity [34], type of glaucoma or healthy participants, and severity of glaucoma at the time of inclusion in the study, could also be responsible for different results between the individual studies. An important pitfall in the studies included is the duration and the frequency of visual field testing. It was long recognised that the observation period for trials of visual field preservation in patients with open-angle glaucoma is typically five years or longer to find visual field deterioration [53]. Importantly, Garway-Heath et al. recently demonstrated that a period of at least 24 months with repeated (clustered) visual field tests at the beginning and end of the observation period is required to detect visual field progression sufficiently [53, 54]. This duration or follow-up schedule was not used in the included studies. Therefore, the impact of GBE supplementation on visual field progression should be interpreted considering this important limitation.

The UK Glaucoma Treatment Study (UKGTS) was the first placebo-controlled RCT demonstrating the preservation of the visual field by a conventional IOP-lowering drug (latanoprost) in patients with open-angle glaucoma [53]. Visual field deterioration occurred in 15.2% of the patients treated with latanoprost and 25.6% without treatment (placebo group) [53]. However, in our study, there was no significant difference between patients receiving GBE combined with the standard therapy for glaucoma and the control group receiving the standard treatment only or in combination with placebo at the final follow-up.

The limited number of clinical studies included for analysis represents an important limitation of the present systematic review. Another important limitation is the retrospective design of half of the included studies. Given the limited data available in the literature, the analyses were conducted irrespective of the GBE dose or treatment duration. This study includes NTG, POAG patients, and healthy volunteers. Given the lack of quantitative data, no subgroups were possible to investigate. In addition, the heterogeneous length of follow-up might also limit the reliability of our results. Another important limitation is the short follow-up time for the included studies. Hypothetically, only long-term therapy, possibly over several years, with GBE has a positive effect on the visual field and glaucoma progression. Given the limited data available, a stratified analysis to determine the minimum required duration of therapy with GBE was not possible. Future studies should investigate the minimum treatment necessary and follow-up durations further. Furthermore, based on the different investigators and implementation options, it cannot be ruled out that the parameters investigated in this study, especially visual field testing, were not evaluated identically in all included studies. Given the limited data available for inclusion and the poor evidence of the included studies, a formal meta-analysis was not conducted. Additional comparative studies are required. Given the paucity of data available, a formal meta-analysis was not conducted. Moreover, variability in the

content of the placebo and the unpredictable nature intrinsic to placebo administration might exert an influence on the reliability of the results. Therefore, additional research using an active comparator is necessary to establish the potential of GBE on glaucoma parameters including visual field damage progression. The studies included in this systematic review investigated the efficacy of GBE as an adjuvant therapy only in NTG, POAG, or healthy participants. Therefore, our results cannot be generalised to all glaucoma subtypes. For a better understanding of the impact of GBE as a preventive or adjunctive neuroprotective therapy in healthy patients or patients with glaucoma, future larger cohort studies should focus on long-term outcomes. Moreover, further parameters which indicate glaucoma progression, such as the peripapillary retinal nerve fibre layer [55] or Bruch's membrane opening-minimum rim width [56], should be considered.

## Conclusion

GBE did not significantly improve IOP, the mean deviation and CPSD of visual field testing, or heart rate in patients with NTG, POAG, or healthy volunteers. These conclusions must be interpreted within the limitations of the present study, in particular, the overall too-short follow-up time of the included studies to detect visual field changes validly. Future large cohort randomised controlled trials are warranted to further establish the role of GBE in the different glaucoma subtypes.

## Supporting information

### S1 Checklist.

(DOCX)

**S1 Table. Generalities of the included studies and values included in the analyses (GBE: *Ginkgo biloba* extract, NTG: Normal tension glaucoma, POAG: Primary open-angle glaucoma, IOP: Intraocular pressure, pre: Pre-treatment, post: Post-treatment, MD: Mean deviation of the visual field testing, CPSD: Corrected pattern standard deviation of visual field testing, bpm: Beats per minute, NR: Not reported).** All data was extracted in December 2023.

(DOCX)

### S2 Table. Results of the literature search.

(PDF)

## Author Contributions

**Conceptualization:** Julia Prinz, Verena Prokosch, Peter Walter, Matthias Fuest, Filippo Migliorini.

**Data curation:** Julia Prinz, Verena Prokosch, Filippo Migliorini.

**Formal analysis:** Filippo Migliorini.

**Investigation:** Julia Prinz.

**Methodology:** Filippo Migliorini.

**Supervision:** Verena Prokosch, Matthias Fuest, Filippo Migliorini.

**Validation:** Yuan Feng.

**Visualization:** Xiaosha Wang, Yuan Feng.

**Writing – original draft:** Julia Prinz.

**Writing – review & editing:** Verena Prokosch, Peter Walter, Matthias Fuest, Filippo Migliorini.

## References

1. Almasieh M, Wilson AM, Morquette B, Cueva Vargas JL, Di Polo A. The molecular basis of retinal ganglion cell death in glaucoma. *Prog Retin Eye Res.* 2012; 31(2):152–81. <https://doi.org/10.1016/j.preteyeres.2011.11.002> PMID: 22155051
2. Fry LE, Fahy E, Chrysostomou V, Hui F, Tang J, van Wijngaarden P, et al. The coma in glaucoma: Retinal ganglion cell dysfunction and recovery. *Prog Retin Eye Res.* 2018; 65:77–92. <https://doi.org/10.1016/j.preteyeres.2018.04.001> PMID: 29631042
3. Mallick J, Devi L, Malik PK, Mallick J. Update on Normal Tension Glaucoma. *J Ophthalmic Vis Res.* 2016; 11(2):204–8. <https://doi.org/10.4103/2008-322X.183914> PMID: 27413503
4. Keating DJ. Mitochondrial dysfunction, oxidative stress, regulation of exocytosis and their relevance to neurodegenerative diseases. *J Neurochem.* 2008; 104(2):298–305. <https://doi.org/10.1111/j.1471-4159.2007.04997.x> PMID: 17961149
5. Prinz J, Prokosch V, Liu H, Walter P, Fuest M, Migliorini F. Efficacy of citicoline as a supplement in glaucoma patients: A systematic review. *PLoS One.* 2023; 18(9):e0291836. <https://doi.org/10.1371/journal.pone.0291836> PMID: 37768938
6. Prinz J, Walter P, Liu H, Prokosch V. The Impact of Aging on the Function of Retinal Ganglion Cells. *Klin Monbl Augenheilkd.* 2024; 241(2):162–9.
7. Osborne NN, Chidlow G, Wood JP. Glutamate excitotoxicity in glaucoma: truth or fiction? By AJ Lotery. *Eye (Lond).* 2006; 20(12):1392–4. <https://doi.org/10.1038/sj.eye.6702234> PMID: 16440018
8. Dada T, Mittal D, Mohanty K, Faiq MA, Bhat MA, Yadav RK, et al. Mindfulness Meditation Reduces Intraocular Pressure, Lowers Stress Biomarkers and Modulates Gene Expression in Glaucoma: A Randomized Controlled Trial. *J Glaucoma.* 2018; 27(12):1061–7. <https://doi.org/10.1097/IJGJ.0000000000001088> PMID: 30256277
9. Fadini GP, Pagano C, Baesso I, Kotsafti O, Doro D, de Kreutzenberg SV, et al. Reduced endothelial progenitor cells and brachial artery flow-mediated dilation as evidence of endothelial dysfunction in ocular hypertension and primary open-angle glaucoma. *Acta Ophthalmol.* 2010; 88(1):135–41. <https://doi.org/10.1111/j.1755-3768.2009.01573.x> PMID: 19549102
10. Ito YA, Di Polo A. Mitochondrial dynamics, transport, and quality control: A bottleneck for retinal ganglion cell viability in optic neuropathies. *Mitochondrion.* 2017; 36:186–92. <https://doi.org/10.1016/j.mito.2017.08.014> PMID: 28866056
11. Johnson TV, Bull ND, Martin KR. Neurotrophic factor delivery as a protective treatment for glaucoma. *Exp Eye Res.* 2011; 93(2):196–203. <https://doi.org/10.1016/j.exer.2010.05.016> PMID: 20685205
12. Nicolela MT. Clinical clues of vascular dysregulation and its association with glaucoma. *Can J Ophthalmol.* 2008; 43(3):337–41. <https://doi.org/10.3129/i08-063> PMID: 18493274
13. Fan X, Ying Y, Zhai R, Sheng Q, Sun Y, Xu H, et al. The characteristics of fundus microvascular alterations in the course of glaucoma: a narrative review. *Ann Transl Med.* 2022; 10(9):527. <https://doi.org/10.21037/atm-21-5695> PMID: 35928752
14. Konieczka K, Ritch R, Traverso CE, Kim DM, Kook MS, Gallino A, et al. Flammer syndrome. *Epma j.* 2014; 5(1):11. <https://doi.org/10.1186/1878-5085-5-11> PMID: 25075228
15. Wang X, Wang M, Liu H, Mercieca K, Prinz J, Feng Y, et al. The Association between Vascular Abnormalities and Glaucoma-What Comes First? *Int J Mol Sci.* 2023; 24(17). <https://doi.org/10.3390/ijms241713211> PMID: 37686017
16. Vellas B, Coley N, Ousset PJ, Berrut G, Dartigues JF, Dubois B, et al. Long-term use of standardised *Ginkgo biloba* extract for the prevention of Alzheimer's disease (GuidAge): a randomised placebo-controlled trial. *Lancet Neurol.* 2012; 11(10):851–9. [https://doi.org/10.1016/S1474-4422\(12\)70206-5](https://doi.org/10.1016/S1474-4422(12)70206-5) PMID: 22959217
17. Labkovich M, Jacobs EB, Bhargava S, Pasquale LR, Ritch R. *Ginkgo Biloba* Extract in Ophthalmic and Systemic Disease, With a Focus on Normal-Tension Glaucoma. *Asia Pac J Ophthalmol (Phila).* 2020; 9(3):215–25. <https://doi.org/10.1097/APO.0000000000000279> PMID: 32282348
18. Martínez-Solís I, Acero N, Bosch-Morell F, Castillo E, González-Rosende ME, Muñoz-Mingarro D, et al. Neuroprotective Potential of *Ginkgo biloba* in Retinal Diseases. *Planta Med.* 2019; 85(17):1292–303. <https://doi.org/10.1055/a-0947-5712> PMID: 31266069

19. Evans JR. Ginkgo biloba extract for age-related macular degeneration. *Cochrane Database Syst Rev*. 2013; 2013(1):Cd001775. <https://doi.org/10.1002/14651858.CD001775.pub2> PMID: 23440785
20. DeFeudis FV, Drieu K. Ginkgo biloba extract (EGb 761) and CNS functions: basic studies and clinical applications. *Curr Drug Targets*. 2000; 1(1):25–58. <https://doi.org/10.2174/1389450003349380> PMID: 11475535
21. Ou HC, Lee WJ, Lee IT, Chiu TH, Tsai KL, Lin CY, et al. Ginkgo biloba extract attenuates oxLDL-induced oxidative functional damages in endothelial cells. *J Appl Physiol* (1985). 2009; 106(5):1674–85. <https://doi.org/10.1152/japplphysiol.91415.2008> PMID: 19228986
22. Brown GC, Neher JJ. Microglial phagocytosis of live neurons. *Nat Rev Neurosci*. 2014; 15(4):209–16. <https://doi.org/10.1038/nrn3710> PMID: 24646669
23. Gargouri B, Carstensen J, Bhatia HS, Huell M, Dietz GPH, Fiebich BL. Anti-neuroinflammatory effects of Ginkgo biloba extract EGb761 in LPS-activated primary microglial cells. *Phytomedicine*. 2018; 44:45–55. <https://doi.org/10.1016/j.phymed.2018.04.009> PMID: 29895492
24. Wu Y, Li S, Cui W, Zu X, Du J, Wang F. Ginkgo biloba extract improves coronary blood flow in healthy elderly adults: role of endothelium-dependent vasodilation. *Phytomedicine*. 2008; 15(3):164–9. <https://doi.org/10.1016/j.phymed.2007.12.002> PMID: 18258419
25. Kotil K, Uyar R, Bilge T, Ton T, Kucukhuseyin C, Koldas M, et al. Investigation of the dose-dependent antivasospastic effect of Ginkgo biloba extract (EGb 761) in experimental subarachnoid hemorrhage. *J Clin Neurosci*. 2008; 15(12):1382–6. <https://doi.org/10.1016/j.jocn.2007.10.005> PMID: 18951801
26. Ige M, Liu J. Herbal Medicines in Glaucoma Treatment. *Yale J Biol Med*. 2020; 93(2):347–53. <https://doi.org/10.1016/j.jfs.2005.09.012> PMID: 32607093
27. Cybulska-Heinrich AK, Mozaffarieh M, Flammer J. Ginkgo biloba: an adjuvant therapy for progressive normal and high tension glaucoma. *Mol Vis*. 2012; 18:390–402. PMID: 22355250
28. Shim SH, Kim JM, Choi CY, Kim CY, Park KH. Ginkgo biloba extract and bilberry anthocyanins improve visual function in patients with normal tension glaucoma. *J Med Food*. 2012; 15(9):818–23. <https://doi.org/10.1089/jmf.2012.2241> PMID: 22870951
29. Lee J, Sohn SW, Kee C. Effect of Ginkgo biloba extract on visual field progression in normal tension glaucoma. *J Glaucoma*. 2013; 22(9):780–4. <https://doi.org/10.1097/IJG.0b013e3182595075> PMID: 22595937
30. Howick J CI, Glasziou P, Greenhalgh T, Carl Heneghan, Liberati A, Moschetti I, et al. The 2011 Oxford CEBM Levels of Evidence. Oxford Centre for Evidence-Based Medicine <https://www.cebmnet/index.aspx?o=5653>. 2011.
31. Page MJ, McKenzie JE, Bossuyt PM, Boutron I, Hoffmann TC, Mulrow CD, et al. The PRISMA 2020 statement: an updated guideline for reporting systematic reviews. *BMJ*. 2021; 372:n71. <https://doi.org/10.1136/bmj.n71> PMID: 33782057
32. Cumpston M, Li T, Page MJ, Chandler J, Welch VA, Higgins JP, et al. Updated guidance for trusted systematic reviews: a new edition of the Cochrane Handbook for Systematic Reviews of Interventions. *Cochrane Database Syst Rev*. 2019; 10:ED000142. <https://doi.org/10.1002/14651858.ED000142> PMID: 31643080
33. Sterne JA, Hernan MA, Reeves BC, Savovic J, Berkman ND, Viswanathan M, et al. ROBINS-I: a tool for assessing risk of bias in non-randomised studies of interventions. *BMJ*. 2016; 355:i4919. <https://doi.org/10.1136/bmj.i4919> PMID: 27733354
34. Guo X, Kong X, Huang R, Jin L, Ding X, He M, et al. Effect of Ginkgo biloba on visual field and contrast sensitivity in Chinese patients with normal tension glaucoma: a randomized, crossover clinical trial. *Invest Ophthalmol Vis Sci*. 2014; 55(1):110–6. <https://doi.org/10.1167/iov.13-13168> PMID: 24282229
35. Quaranta L, Bettelli S, Uva MG, Semeraro F, Turano R, Gandolfo E. Effect of Ginkgo biloba extract on preexisting visual field damage in normal tension glaucoma. *Ophthalmology*. 2003; 110(2):359–62; discussion 62–4. [https://doi.org/10.1016/S0161-6420\(02\)01745-1](https://doi.org/10.1016/S0161-6420(02)01745-1) PMID: 12578781
36. Sabaner MC, Dogan M, Altin SS, Balaman C, Yilmaz C, Omur A, et al. Ginkgo Biloba affects microvascular morphology: a prospective optical coherence tomography angiography pilot study. *Int Ophthalmol*. 2021; 41(3):1053–61. <https://doi.org/10.1007/s10792-020-01663-3> PMID: 33392942
37. Sari MD. Ginkgo Biloba Extract Effect on Oxidative Stress Marker Malondialdehyde, Redox Enzyme Glutathione Peroxidase, Visual Field Damage, and Retinal Nerve Fiber Layer Thickness in Primary Open Angle Glaucoma. 2016.
38. Chung HS, Harris A, Kristinsson JK, Ciulla TA, Kagemann C, Ritch R. Ginkgo biloba extract increases ocular blood flow velocity. *Journal of ocular pharmacology and therapeutics*. 1999; 15(3):233–40. <https://doi.org/10.1089/jop.1999.15.233> PMID: 10385132
39. Park JW, Kwon HJ, Chung WS, Kim CY, Seong GJ. Short-term effects of Ginkgo biloba extract on peripapillary retinal blood flow in normal tension glaucoma. *Korean J Ophthalmol*. 2011; 25(5):323–8. <https://doi.org/10.3341/kjo.2011.25.5.323> PMID: 21976939

40. Mohammadi Zonouz A, Ghasemzadeh Rahbardar M, Hosseinzadeh H. The molecular mechanisms of ginkgo (*Ginkgo biloba*) activity in signaling pathways: A comprehensive review. *Phytomedicine*. 2024; 126:155352. <https://doi.org/10.1016/j.phymed.2024.155352> PMID: 38342017
41. Cheng SM, Yang SP, Ho LJ, Tsao TP, Juan TY, Chang DM, et al. Down-regulation of c-jun N-terminal kinase-activator protein-1 signaling pathway by *Ginkgo biloba* extract in human peripheral blood T cells. *Biochem Pharmacol*. 2003; 66(4):679–89. [https://doi.org/10.1016/s0006-2952\(03\)00388-5](https://doi.org/10.1016/s0006-2952(03)00388-5) PMID: 12906932
42. Mossböck G, Weger M, Moray M, Renner W, Haller-Schober EM, Mattes D, et al. TNF-alpha promoter polymorphisms and primary open-angle glaucoma. *Eye (Lond)*. 2006; 20(9):1040–3. <https://doi.org/10.1038/sj.eye.6702078> PMID: 16138112
43. Wang Y, Fung NSK, Lam WC, Lo ACY. mTOR Signalling Pathway: A Potential Therapeutic Target for Ocular Neurodegenerative Diseases. *Antioxidants (Basel)*. 2022; 11(7). <https://doi.org/10.3390/antiox11071304> PMID: 35883796
44. Naguib S, Backstrom JR, Artis E, Ghose P, Stahl A, Hardin R, et al. NRF2/ARE mediated antioxidant response to glaucoma: role of glia and retinal ganglion cells. *Acta Neuropathol Commun*. 2023; 11(1):171. <https://doi.org/10.1186/s40478-023-01663-1> PMID: 37875948
45. Harun-Or-Rashid M, Inman DM. Reduced AMPK activation and increased HCAR activation drive anti-inflammatory response and neuroprotection in glaucoma. *J Neuroinflammation*. 2018; 15(1):313. <https://doi.org/10.1186/s12974-018-1346-7> PMID: 30424795
46. Chan KKW, Tang F, Tham CCY, Young AL, Cheung CY. Retinal vasculature in glaucoma: a review. *BMJ Open Ophthalmol*. 2017; 1(1):e000032. <https://doi.org/10.1136/bmjophth-2016-000032> PMID: 29354699
47. Flammer J. [Normal-pressure glaucoma]. *Fortschr Ophthalmol*. 1990; 87 Suppl:S187–9.
48. Nishida S, Satoh H. Mechanisms for the vasodilations induced by *Ginkgo biloba* extract and its main constituent, bilobalide, in rat aorta. *Life Sci*. 2003; 72(23):2659–67. [https://doi.org/10.1016/s0024-3205\(03\)00177-2](https://doi.org/10.1016/s0024-3205(03)00177-2) PMID: 12672511
49. Tada Y, Kagota S, Kubota Y, Nejime N, Nakamura K, Kunitomo M, et al. Long-term feeding of *Ginkgo biloba* extract impairs peripheral circulation and hepatic function in aged spontaneously hypertensive rats. *Biol Pharm Bull*. 2008; 31(1):68–72. <https://doi.org/10.1248/bpb.31.68> PMID: 18175944
50. Jin Y, Wang X, Irnadiastputri SFR, Mohan RE, Aung T, Perera SA, et al. Effect of Changing Heart Rate on the Ocular Pulse and Dynamic Biomechanical Behavior of the Optic Nerve Head. *Invest Ophthalmol Vis Sci*. 2020; 61(4):27. <https://doi.org/10.1167/iovs.61.4.27> PMID: 32315378
51. Chauhan BC, Danthurebandara VM, Sharpe GP, Demirel S, Girkin CA, Mardin CY, et al. Bruch's Membrane Opening Minimum Rim Width and Retinal Nerve Fiber Layer Thickness in a Normal White Population: A Multicenter Study. *Ophthalmology*. 2015; 122(9):1786–94. <https://doi.org/10.1016/j.ophtha.2015.06.001> PMID: 26198806
52. Tun TA, Sun CH, Baskaran M, Girard MJ, de Leon JM, Cheng CY, et al. Determinants of optical coherence tomography-derived minimum neuroretinal rim width in a normal Chinese population. *Invest Ophthalmol Vis Sci*. 2015; 56(5):3337–44. <https://doi.org/10.1167/iovs.15-16786> PMID: 26024117
53. Garway-Heath DF, Crabb DP, Bunce C, Lascaratos G, Amalfitano F, Anand N, et al. Latanoprost for open-angle glaucoma (UKGTS): a randomised, multicentre, placebo-controlled trial. *Lancet*. 2015; 385(9975):1295–304. [https://doi.org/10.1016/S0140-6736\(14\)62111-5](https://doi.org/10.1016/S0140-6736(14)62111-5) PMID: 25533656
54. Crabb DP, Garway-Heath DF. Intervals between visual field tests when monitoring the glaucomatous patient: wait-and-see approach. *Invest Ophthalmol Vis Sci*. 2012; 53(6):2770–6. <https://doi.org/10.1167/iovs.12-9476> PMID: 22427597
55. Leung CK, Choi N, Weinreb RN, Liu S, Ye C, Liu L, et al. Retinal nerve fiber layer imaging with spectral-domain optical coherence tomography: pattern of RNFL defects in glaucoma. *Ophthalmology*. 2010; 117(12):2337–44. <https://doi.org/10.1016/j.ophtha.2010.04.002> PMID: 20678802
56. Cho HK, Kee C. Rate of Change in Bruch's Membrane Opening-Minimum Rim Width and Peripapillary RNFL in Early Normal Tension Glaucoma. *J Clin Med*. 2020; 9(8). <https://doi.org/10.3390/jcm9082321> PMID: 32707745
